# Supplementary material for: Chemical Variability of the Essential Oils from Two Portuguese Apiaceae: Coriandrum sativum L. and Foeniculum vulgare Mill.
Source: MDPI journal article supplement (doi:10.3390/plants12142749), 2023-07-24
Supplement: s1 [file s1]

## Article

# Chemical variability of the essential oils from two Portuguese Apiaceae: *Coriandrum sativum* L. and *Foeniculum vulgare* Mill.

Alexandra M. Machado <sup>1,\*</sup>, Violeta Lopes <sup>2</sup>, Ana M. Barata <sup>2</sup>, Orlanda Póvoa <sup>3,4</sup>, Noémia Farinha <sup>4</sup> and A. Cristina Figueiredo <sup>1,\*</sup>

<sup>1</sup> Centro de Estudos do Ambiente e do Mar (CESAM Lisboa), Faculdade de Ciências da Universidade de Lisboa (FCUL), Biotecnologia Vegetal, DBV, C2, Campo Grande, 1749-016 Lisboa, Portugal

<sup>2</sup> Banco Português de Germoplasma Vegetal (BPGV), Instituto Nacional de Investigação Agrária e Veterinária, Quinta de S. José, S. Pedro de Merelim, 4700-859 Braga, Portugal; violeta.lopes@iniav.pt (V. L.); anamaria.barata@iniav.pt (A.M.B.)

<sup>3</sup> VALORIZA—Centro de Investigação para a Valorização de Recursos Endógenos, Instituto Politécnico de Portalegre, Praça do Município 11, 7300-110 Portalegre, Portugal; opovoa@ipportalegre.pt

<sup>4</sup> Instituto Politécnico de Portalegre, Praça do Município 11, 7300-110 Portalegre, Portugal; nfarinha@ipportalegre.pt

\* Correspondence: ialexam@gmail.com (A.M.M.); acsf@fc.ul.pt (A.C.F.);  
Tel.: +351-21-750-0257 (A.M.M. & A.C.F.)

**Table S1.** Percentage composition of the EOs isolated by hydrodistillation, from *Coriandrum sativum* fruits and vegetative aerial parts accessions grown at the experimental field of Escola Superior Agrária de Elvas. For samples codes, see Table 1.

| Components                                   | RI   | Accessions       |                  |                  |                         |                  |                  |              |               |                  |                  |                  |
|----------------------------------------------|------|------------------|------------------|------------------|-------------------------|------------------|------------------|--------------|---------------|------------------|------------------|------------------|
|                                              |      | Fruits           |                  |                  | Vegetative aerial parts |                  |                  |              |               |                  |                  |                  |
|                                              |      | Cs21_fr1<br>2021 | Cs21_fr2<br>2021 | Cs21_fr3<br>2021 | Cs22_lv1<br>2022        | Cs22_lv2<br>2022 | Cs22_lv3<br>2022 | ROMA<br>2022 | SANTO<br>2022 | Cs22_lv4<br>2022 | Cs22_lv5<br>2022 | Cs22_lv6<br>2022 |
| <i>n</i> -Octane                             | 800  |                  |                  |                  | t                       | t                | t                | t            | t             | t                | t                | t                |
| 2- <i>trans</i> -Hexenal                     | 866  |                  |                  |                  | 0.1                     | 0.2              | 0.1              | 0.1          | 0.1           | 0.1              | t                | 0.2              |
| <i>cis</i> -2-Hexen-1-ol                     | 882  |                  |                  |                  | t                       | t                | t                | t            | t             | t                | t                | t                |
| <i>n</i> -Hexanol                            | 883  |                  |                  |                  | t                       | t                | t                | t            | t             | t                | t                | t                |
| <i>n</i> -Heptanal                           | 897  | t                | 0.1              | 0.1              | t                       | t                | t                | t            | t             | t                | t                | t                |
| 1-Nonene                                     | 899  |                  |                  |                  | t                       | t                | t                | t            | t             | t                | t                | t                |
| <i>n</i> -Nonane                             | 900  | t                | t                | t                | 2.1                     | 2.9              | 2.8              | 3.1          | 1.9           | 0.3              | 0.7              | 1.8              |
| <i>trans</i> -3-Nonene *                     | 901  |                  |                  |                  | t                       | t                | t                | t            | t             | t                | t                | t                |
| Tricyclene                                   | 921  | t                | t                | t                |                         |                  |                  |              |               |                  |                  |                  |
| $\alpha$ -Thujene                            | 924  | t                | t                | 0.1              |                         |                  |                  |              |               |                  |                  |                  |
| $\alpha$ -Pinene                             | 930  | 1.7              | 4.3              | 3.6              | t                       | t                | 0.1              | 0.1          | 0.1           | t                | t                | 0.3              |
| Camphene                                     | 938  | 0.1              | 0.4              | 0.3              |                         |                  |                  |              |               |                  |                  |                  |
| <i>n</i> -Heptanol                           | 952  | t                | t                | t                | t                       | t                | t                | t            | t             | t                | t                | t                |
| Sabinene                                     | 958  | 0.2              | 0.4              | 0.4              | t                       | t                | t                | t            | t             | t                | t                | t                |
| $\beta$ -Pinene                              | 963  | 0.3              | 0.5              | 0.5              | t                       | t                | t                | t            | t             | t                | t                | t                |
| 3-Methyl nonane *                            | 970  |                  |                  |                  | t                       | t                | t                | t            | t             | t                | t                | t                |
| 2-Pentyl furan                               | 973  | t                | t                | t                |                         |                  |                  |              |               |                  |                  |                  |
| <i>n</i> -Octanal                            | 973  | 0.1              | t                | 0.1              | 1.1                     | 1.1              | 1.2              | 1.2          | 1.2           | 1.1              | 0.7              | 0.8              |
| $\beta$ -Myrcene                             | 975  | 0.7              | 1.1              | 0.9              | 0.4                     | 0.4              | 0.5              | 0.7          | 0.7           | 0.5              | 0.5              | 0.5              |
| $\alpha$ -Phellandrene                       | 995  | t                | t                | t                |                         |                  |                  |              |               |                  |                  |                  |
| <i>n</i> -Decane                             | 1000 | t                | t                | t                | 0.1                     | 0.2              | 0.2              | 0.2          | 0.1           | t                | 0.1              | 0.1              |
| Phenylacetaldehyde (Benzene<br>acetaldehyde) | 1002 |                  |                  |                  | t                       | t                | t                | t            | t             | t                | t                | t                |
| $\alpha$ -Terpinene                          | 1002 | 0.1              | 0.1              | 0.1              |                         |                  |                  |              |               |                  |                  |                  |
| <i>p</i> -Cymene                             | 1003 | 1.6              | 1.4              | 2.1              | t                       | t                | t                | t            | t             | t                | t                | t                |
| 1,8-Cineole                                  | 1005 | t                | t                | t                | t                       | t                | t                | t            | t             | 0.1              | 0.1              | t                |

| Components                      | RI   | Accessions  |             |             |                         |             |             |             |             |             |             |             |
|---------------------------------|------|-------------|-------------|-------------|-------------------------|-------------|-------------|-------------|-------------|-------------|-------------|-------------|
|                                 |      | Fruits      |             |             | Vegetative aerial parts |             |             |             |             |             |             |             |
|                                 |      | Cs21_fr1    | Cs21_fr2    | Cs21_fr3    | Cs22_lv1                | Cs22_lv2    | Cs22_lv3    | ROMA        | SANTO       | Cs22_lv4    | Cs22_lv5    | Cs22_lv6    |
|                                 |      | 2021        | 2021        | 2021        | 2022                    | 2022        | 2022        | 2022        | 2022        | 2022        | 2022        | 2022        |
| $\beta$ -Phellandrene           | 1005 | 0.1         | 0.1         | 0.1         |                         |             |             |             |             |             |             |             |
| Limonene                        | 1009 | 1.2         | 1.8         | 1.4         | 0.2                     | 0.3         | 0.4         | 0.3         | 0.1         | 0.3         | 0.3         | 0.1         |
| <i>cis</i> - $\beta$ -Ocimene   | 1017 | t           | t           | t           |                         |             |             |             |             |             |             |             |
| <i>trans</i> - $\beta$ -Ocimene | 1027 | 0.1         | t           | 0.1         | t                       | t           | t           | t           | t           | t           | t           | 0.1         |
| $\gamma$ -Terpinene             | 1035 | 10.4        | 8.1         | 12.0        | t                       | t           | t           | t           | t           | t           | t           | 0.3         |
| <i>trans</i> -Sabinene hydrate  | 1037 | t           | t           | t           |                         |             |             |             |             |             |             |             |
| <i>n</i> -Octanol               | 1045 | 0.2         | t           | 0.1         | t                       | t           | t           | t           | t           | t           | 0.1         | t           |
| Terpinolene                     | 1064 | 0.4         | 0.4         | 0.4         | t                       | t           | t           | t           | t           | t           | t           | t           |
| <i>n</i> -Nonanal               | 1073 | 1.1         | 0.4         | 0.4         | 0.6                     | 0.7         | 1.0         | 0.6         | 0.6         | 0.4         | 0.6         | 0.5         |
| Linalool                        | 1074 | <b>64.0</b> | <b>72.6</b> | <b>59.6</b> | 0.1                     | 0.2         | 0.1         | 0.1         | 0.1         | t           | t           | 0.4         |
| <i>n</i> -Undecane              | 1100 |             |             |             | t                       | t           | t           | 0.1         | t           | t           | t           | t           |
| Camphor                         | 1102 | 1.3         | 2.1         | 0.9         | t                       | t           | t           | t           | t           | t           | t           | t           |
| Isopulegol                      | 1121 | 0.1         | 0.1         | t           |                         |             |             |             |             |             |             |             |
| 2- <i>trans</i> -Nonen-1-al     | 1124 |             |             |             | t                       | 0.1         | 0.1         | 0.1         | 0.1         | 0.1         | t           | t           |
| Borneol                         | 1134 | t           | t           | t           |                         |             |             |             |             |             |             |             |
| <i>n</i> -Nonanol               | 1148 |             |             |             | 0.1                     | 0.1         | 0.1         | 0.1         | 0.1         | t           | t           | t           |
| Terpinen-4-ol                   | 1148 | 0.2         | 0.2         | 0.1         |                         |             |             |             |             |             |             |             |
| $\alpha$ -Terpineol             | 1159 | 0.1         | 0.2         | 0.1         |                         |             |             |             |             |             |             |             |
| 4- <i>cis</i> -Decenal          | 1163 |             |             |             | 0.7                     | 1.1         | 1.0         | 1.1         | 1.1         | 1.0         | 1.1         | 0.6         |
| <i>n</i> -Decanal               | 1180 | 1.9         | 0.7         | 1.6         | <b>30.2</b>             | <b>28.1</b> | <b>26.2</b> | <b>29.4</b> | <b>29.3</b> | <b>13.2</b> | <b>19.3</b> | <b>23.5</b> |
| Pulegone                        | 1207 |             |             |             | t                       | t           | t           | t           | t           | t           | t           | t           |
| Citronellol                     | 1211 | 0.2         | 0.1         | 0.1         |                         |             |             |             |             |             |             |             |
| Geraniol                        | 1236 | 0.8         | t           | 0.9         |                         |             |             |             |             |             |             |             |
| 2- <i>trans</i> -Decenal        | 1236 | 3.3         | 1.9         | 1.4         | <b>40.1</b>             | <b>40.7</b> | <b>39.2</b> | <b>36.7</b> | <b>38.0</b> | <b>63.3</b> | <b>49.3</b> | <b>39.1</b> |
| 2- <i>trans</i> -Decen-1-ol *   | 1256 |             |             |             | 1.0                     | 1.2         | 1.7         | 1.8         | 1.7         | 0.6         | 0.7         | 0.5         |
| <i>n</i> -Decanol               | 1259 | 0.2         | 0.1         | 0.4         | 1.3                     | 1.3         | 1.7         | 1.7         | 1.8         | 0.6         | 0.5         | 0.3         |
| <i>p</i> -Cymen-7-ol            | 1265 | 0.1         | t           | t           |                         |             |             |             |             |             |             |             |
| 4-Vinylguaiaicol                | 1285 |             |             |             | 0.1                     | 0.1         | 0.1         | 0.1         | 0.1         | t           | t           | 0.1         |

| Components                         | RI   | Accessions |          |          |                         |          |          |      |       |          |          |          |
|------------------------------------|------|------------|----------|----------|-------------------------|----------|----------|------|-------|----------|----------|----------|
|                                    |      | Fruits     |          |          | Vegetative aerial parts |          |          |      |       |          |          |          |
|                                    |      | Cs21_fr1   | Cs21_fr2 | Cs21_fr3 | Cs22_lv1                | Cs22_lv2 | Cs22_lv3 | ROMA | SANTO | Cs22_lv4 | Cs22_lv5 | Cs22_lv6 |
|                                    |      | 2021       | 2021     | 2021     | 2022                    | 2022     | 2022     | 2022 | 2022  | 2022     | 2022     | 2022     |
| <i>n</i> -Undecanal                | 1288 | 0.7        | 0.3      | 0.5      | 1.6                     | 2.0      | 2.2      | 1.7  | 1.6   | 0.6      | 1.7      | 1.9      |
| Myrtenyl acetate                   | 1290 | t          | t        | 0.1      |                         |          |          |      |       |          |          |          |
| 2- <i>trans</i> -Undecenal         | 1334 | 0.1        | t        | 0.1      | 3.7                     | 4.0      | 5.0      | 2.6  | 3.0   | 4.4      | 6.2      | 6.0      |
| <i>trans</i> -2-Undecen-1-ol       | 1355 |            |          |          | 0.1                     | 0.2      | 0.3      | 0.2  | 0.2   | t        | 0.1      | t        |
| 1-Undecanol                        | 1366 |            |          |          | 0.7                     | 0.1      | 0.2      | 0.2  | 0.2   | t        | 0.1      | t        |
| Geranyl acetate                    | 1370 | 1.7        | 1.4      | 4.5      |                         |          |          |      |       |          |          |          |
| <i>n</i> -Dodecanal                | 1397 | 0.3        | 0.1      | 0.2      | 1.6                     | 1.4      | 1.7      | 1.9  | 1.8   | 1.4      | 1.9      | 2.4      |
| $\beta$ -Caryophyllene             | 1414 | 0.1        | t        | t        |                         |          |          |      |       |          |          |          |
| 2- <i>trans</i> -Dodecenal         | 1446 | 1.0        | 0.3      | 0.6      | 7.0                     | 6.8      | 6.3      | 6.8  | 7.4   | 6.0      | 8.2      | 11.8     |
| 2- <i>trans</i> -Dodecen-1-ol      | 1448 |            |          |          | 0.1                     | 0.1      | 0.2      | 0.2  | 0.2   | 0.1      | 0.1      | 0.1      |
| 1-Dodecanol                        | 1468 |            |          |          | t                       | t        | t        | t    | t     | t        | t        | t        |
| $\alpha$ -Amorphene                | 1476 |            |          |          | t                       | t        | t        | t    | t     | t        | t        | t        |
| <i>n</i> -Tridecanal               | 1499 | 0.1        | t        | t        | 0.1                     | 0.1      | 0.1      | 0.1  | 0.1   | 0.1      | 0.2      | 0.2      |
| <i>trans</i> -Nerolidol            | 1549 | t          | t        | 0.1      |                         |          |          |      |       |          |          |          |
| 2- <i>trans</i> -Tridecen-1-al     | 1550 |            |          |          | 0.3                     | 0.3      | 0.5      | 0.4  | 0.4   | 0.2      | 0.3      | 0.6      |
| $\beta$ -Caryophyllene oxide       | 1561 | 0.3        | t        | t        | t                       | t        | t        | t    | t     | t        | t        | t        |
| <i>n</i> -Tetradecanal             | 1596 | t          | t        | t        | 0.3                     | 0.2      | 0.3      | 0.3  | 0.3   | 0.4      | 0.4      | 0.5      |
| T-Cadinol                          | 1616 |            |          |          | t                       | 0.1      | 0.1      | 0.1  | 0.1   | t        | t        | t        |
| $\alpha$ -Cadinol                  | 1630 |            |          |          | t                       | t        | t        | t    | t     | t        | t        | t        |
| 2- <i>trans</i> -Tetradecenal*     | 1643 | 0.2        | 0.1      | 0.2      | 3.2                     | 2.5      | 3.0      | 4.1  | 4.0   | 2.5      | 2.8      | 3.7      |
| Pentadecanal                       | 1688 |            |          |          | t                       | t        | t        | t    | t     | t        | t        | t        |
| Tetradecanoic acid (Myristic acid) | 1723 | 2.2        | 0.1      | 1.6      |                         |          |          |      |       |          |          |          |
| 11-Pentadecenal *                  | 1735 |            |          |          | 0.3                     | 0.3      | 0.2      | 0.4  | 0.4   | 0.2      | 0.3      | 0.4      |
| Pentadecanoic acid *               | 1776 | 0.1        | t        | 0.1      |                         |          |          |      |       |          |          |          |
| Palmitic acid (Hexadecanoic acid)  | 1908 | 1.5        | 0.3      | 2.3      |                         |          |          |      |       |          |          |          |
| Phytol acetate 2                   | 2101 |            |          |          | 0.2                     | 0.2      | 0.3      | 0.2  | 0.2   | 0.4      | 0.4      | 0.3      |
| <i>n</i> -Nonadecanal *            | 2102 |            |          |          | 0.2                     | 0.2      | 0.3      | 0.2  | 0.2   | 0.4      | 0.4      | 0.3      |
| Linoleic acid                      | 2108 | t          | t        | 0.2      |                         |          |          |      |       |          |          |          |

| Components                       | RI   | Accessions |          |          |                         |          |          |      |       |          |          |          |
|----------------------------------|------|------------|----------|----------|-------------------------|----------|----------|------|-------|----------|----------|----------|
|                                  |      | Fruits     |          |          | Vegetative aerial parts |          |          |      |       |          |          |          |
|                                  |      | Cs21_fr1   | Cs21_fr2 | Cs21_fr3 | Cs22_lv1                | Cs22_lv2 | Cs22_lv3 | ROMA | SANTO | Cs22_lv4 | Cs22_lv5 | Cs22_lv6 |
|                                  |      | 2021       | 2021     | 2021     | 2022                    | 2022     | 2022     | 2022 | 2022  | 2022     | 2022     | 2022     |
| Petroselinic acid                | 2128 | 0.1        | t        | 0.6      |                         |          |          |      |       |          |          |          |
| Eicosanal                        | 2200 |            |          |          | t                       | t        | t        | t    | t     | t        | t        | t        |
| <b>% Identification</b>          |      | 98.9       | 99.7     | 98.9     | 97.6                    | 97.2     | 97.2     | 96.9 | 97.2  | 98.3     | 97.1     | 97.4     |
| <b>Grouped components</b>        |      |            |          |          |                         |          |          |      |       |          |          |          |
| Monoterpene hydrocarbons         |      | 16.9       | 18.6     | 22.0     | 0.6                     | 0.7      | 1.0      | 1.1  | 0.9   | 0.8      | 0.8      | 1.3      |
| Oxygen-containing monoterpenes   |      | 68.8       | 76.8     | 66.5     | 0.2                     | 0.3      | 0.2      | 0.2  | 0.2   | 0.1      | 0.1      | 0.5      |
| Sesquiterpene hydrocarbons       |      | 0.1        | t        | t        | t                       | t        | t        | t    | t     | t        | t        | t        |
| Oxygen-containing sesquiterpenes |      | 0.3        | t        | 0.1      | t                       | 0.1      | 0.1      | 0.1  | 0.1   | t        | t        | t        |
| Oxygen-containing diterpenes     |      |            |          |          | 0.2                     | 0.2      | 0.3      | 0.2  | 0.2   | 0.4      | 0.4      | 0.3      |
| Fatty acids                      |      | 3.9        | 0.4      | 4.8      |                         |          |          |      |       |          |          |          |
| Other fatty acid derivatives     |      |            |          |          | 94.3                    | 92.6     | 92.5     | 91.8 | 93.7  | 96.6     | 95.0     | 93.2     |
| Others                           |      | 8.9        | 3.9      | 5.5      | 2.3                     | 3.3      | 3.1      | 3.5  | 2.1   | 0.4      | 0.8      | 2.1      |

RI: In-lab calculated retention index relative to C<sub>8</sub>-C<sub>23</sub> *n*-alkanes on the DB-1 column. t: traces (t < 0.05%). \* Identification based on mass spectrum only. Bold: dominant compounds relevant for each cluster.

**Table S2.** Percentage composition of the EOs isolated by hydrodistillation, from *Foeniculum vulgare* fruit accessions grown at the experimental field of Banco Português de Germoplasma Vegetal. For samples codes, see Table 1.

| Components                                | RI   | Accessions  |             |             |             |             |             |             |             |             |             |             |             |             |             |             |             |             |             |             |
|-------------------------------------------|------|-------------|-------------|-------------|-------------|-------------|-------------|-------------|-------------|-------------|-------------|-------------|-------------|-------------|-------------|-------------|-------------|-------------|-------------|-------------|
|                                           |      | Fv20        | Fv21        |
|                                           |      | _P1         | _P2         | _B          | _VR1        | _VR2        | _VR3        | _VC1        | _VC2        | _VC3        | _CB         | _VR1        | _VR2        | _VR3        | _VR4        | _VR5        | _VC1        | _VC2        | _VC3        | _VC4        |
|                                           |      | 2020        | 2020        | 2020        | 2020        | 2020        | 2020        | 2020        | 2020        | 2020        | 2020        | 2021        | 2021        | 2021        | 2021        | 2021        | 2021        | 2021        | 2021        | 2021        |
| $\alpha$ -Thujene                         | 924  | t           | t           | t           | t           | t           | t           | t           | t           | t           | t           | t           | t           | t           | t           | t           | t           | t           | t           | t           |
| $\alpha$ -Pinene                          | 930  | 0.7         | 0.6         | 0.7         | 0.9         | 0.8         | 1.6         | 0.4         | 0.4         | 0.7         | 0.9         | 2.7         | 1.3         | 1.0         | 1.2         | 1.1         | 2.1         | 1.1         | 0.5         | 1.1         |
| Camphene                                  | 938  | 0.3         | 0.3         | 0.2         | 0.3         | 0.1         | 0.3         | 0.2         | 0.1         | 0.1         | 0.3         | 0.1         | 0.2         | 0.2         | 0.4         | 0.3         | 0.3         | 0.3         | 0.2         | 0.3         |
| Sabinene                                  | 958  | 0.3         | 0.2         | 0.3         | 0.2         | 0.1         | 0.5         | 0.2         | 0.2         | 0.1         | 0.4         | 0.3         | 0.5         | 0.6         | 0.6         | 0.6         | 0.4         | 0.4         | 0.6         | 0.3         |
| $\beta$ -Pinene                           | 963  | 0.1         | 0.1         | 0.1         | 0.2         | 0.1         | 0.2         | 0.5         | t           | 0.1         | 0.1         | 0.4         | t           | 0.5         | 0.1         | 0.1         | 0.3         | 0.3         | 0.4         | 0.2         |
| $\beta$ -Myrcene                          | 975  | 0.9         | 1.3         | 0.7         | 1.0         | 1.1         | 1.5         | 1.0         | 0.6         | 0.4         | 1.3         | 0.6         | 0.9         | 0.8         | 1.2         | 1.4         | 1.2         | 0.9         | 1.5         | 1.0         |
| $\alpha$ -Phellandrene                    | 995  | 0.3         | 0.2         | 0.4         | 0.4         | 0.3         | 0.3         | 0.4         | 0.3         | 0.2         | 0.3         | 0.4         | 0.6         | 0.4         | 0.8         | 0.5         | 0.8         | 0.5         | 1.2         | 0.6         |
| $\alpha$ -Terpinene                       | 1002 | t           | t           | t           | t           | t           | t           | t           | t           | t           | t           | t           | t           | t           | t           | t           | t           | t           | t           | t           |
| <i>p</i> -Cymene                          | 1003 | 0.1         | t           | 0.1         | 0.2         | t           | 0.1         | 0.1         | 0.1         | 0.1         | 0.2         | 0.1         | t           | 0.2         | t           | 0.2         | 0.1         | t           | 0.1         | 0.1         |
| 1,8-Cineole                               | 1005 | 0.8         | 0.3         | 0.7         | 0.7         | 1.0         | 1.6         | 0.5         | 0.8         | 0.3         | 1.2         | 0.6         | 1.1         | 1.0         | 2.0         | 1.6         | t           | 1.1         | 1.3         | 1.0         |
| $\beta$ -Phellandrene                     | 1005 | t           | t           | t           | t           | t           | t           | t           | t           | t           | t           | t           | t           | t           | t           | t           | 1.1         | t           | t           | t           |
| Limonene                                  | 1009 | 3.6         | 4.9         | 3.1         | 3.4         | 3.5         | 3.3         | 2.8         | 1.4         | 1.9         | 2.5         | 1.3         | 2.1         | 7.1         | 5.1         | 2.6         | 2.2         | 2.7         | 3.8         | 2.2         |
| <i>cis</i> - $\beta$ -Ocimene             | 1017 | t           | t           | t           | 0.1         | t           | 0.1         | t           | t           | t           | 0.1         | t           | t           | t           | t           | t           | t           | t           | t           | t           |
| <i>trans</i> - $\beta$ -Ocimene           | 1027 | t           | t           | t           | t           | t           | t           | t           | t           | t           | t           | t           | t           | t           | t           | t           | t           | t           | t           | t           |
| $\gamma$ -Terpinene                       | 1035 | 1.0         | 0.4         | 0.9         | 1.1         | 0.3         | 1.0         | 1.1         | 0.3         | 0.4         | 1.6         | 0.8         | 0.5         | 2.2         | 0.3         | 2.4         | 0.7         | 0.6         | 1.3         | 0.9         |
| <i>trans</i> -Sabinene hydrate            | 1037 | 0.2         | 0.1         | 0.1         | 0.1         | 0.1         | 0.1         | 0.1         | 0.1         | 0.1         | 0.1         | t           | 0.1         | 0.2         | 0.1         | 0.2         | 0.1         | t           | t           | 0.1         |
| Fenchone                                  | 1050 | <b>32.1</b> | <b>34.1</b> | <b>21.0</b> | <b>22.5</b> | <b>29.6</b> | <b>22.5</b> | <b>26.2</b> | <b>17.5</b> | <b>17.3</b> | <b>25.9</b> | <b>15.8</b> | <b>26.8</b> | <b>23.1</b> | <b>28.9</b> | <b>24.4</b> | <b>17.8</b> | <b>19.2</b> | <b>13.6</b> | <b>27.3</b> |
| 6,7-Myrcene epoxide                       | 1064 |             |             |             |             |             |             |             |             |             |             | t           | t           | t           | t           | t           | t           | t           | t           | t           |
| Terpinolene                               | 1064 | 0.2         | 0.3         | 0.1         | 0.1         | 0.1         | 0.2         | 0.3         | 0.1         | 0.1         | 0.2         | t           | 0.1         | 0.2         | 0.2         | 0.2         | 0.1         | 0.1         | t           | 0.2         |
| <i>cis</i> -Sabinene hydrate              | 1066 | t           | t           | t           | t           | t           | t           | t           | t           | t           | t           | t           | t           | t           | t           | t           | t           | t           | t           | t           |
| Linalool                                  | 1074 |             |             |             |             |             |             |             |             |             |             | t           | 0.4         | t           | 0.1         | t           | t           |             |             | t           |
| Isopentyl isovalerate                     | 1080 |             |             |             |             |             |             |             |             |             |             | t           |             | t           | t           | t           | t           | t           | t           | t           |
| $\alpha$ -Fenchol ( <i>endo</i> -Fenchol) | 1085 |             |             |             |             |             |             |             |             |             |             | t           | t           | 0.2         | t           | 0.2         | t           | t           | t           | t           |
| Camphor                                   | 1102 | 0.7         | 0.7         | 0.4         | 0.5         | 0.6         | 0.5         | 0.5         | 0.4         | 0.2         | 0.5         | 0.3         | 0.5         | 0.5         | 0.5         | 0.5         | 0.3         | 0.4         | 0.2         | 0.5         |
| $\delta$ -Terpineol                       | 1134 |             |             |             |             |             |             |             |             |             |             |             | t           | t           | t           | t           |             | t           |             |             |
| Terpinen-4-ol                             | 1148 | 0.1         | 0.1         | t           | t           | t           | 0.1         | t           | 0.1         | t           | 0.1         | t           | t           | 0.1         | t           | 0.1         | t           | t           | t           | t           |

| Components                        | RI   | Accessions  |             |             |             |             |             |             |             |             |             |             |             |             |             |             |             |             |             |             |
|-----------------------------------|------|-------------|-------------|-------------|-------------|-------------|-------------|-------------|-------------|-------------|-------------|-------------|-------------|-------------|-------------|-------------|-------------|-------------|-------------|-------------|
|                                   |      | Fv20_P1     | Fv20_P2     | Fv20_B      | Fv20_VR1    | Fv20_VR2    | Fv20_VR3    | Fv20_VC1    | Fv20_VC2    | Fv20_VC3    | Fv20_CB     | Fv21_VR1    | Fv21_VR2    | Fv21_VR3    | Fv21_VR4    | Fv21_VR5    | Fv21_VC1    | Fv21_VC2    | Fv21_VC3    | Fv21_VC4    |
|                                   |      | 2020        | 2020        | 2020        | 2020        | 2020        | 2020        | 2020        | 2020        | 2020        | 2020        | 2021        | 2021        | 2021        | 2021        | 2021        | 2021        | 2021        | 2021        | 2021        |
| $\alpha$ -Terpineol               | 1159 | t           | t           | t           | t           | t           | t           | t           | t           | t           | t           | t           | 0.1         | 0.1         | 0.1         | 0.2         | t           |             | t           | t           |
| Estragole (Methyl chavicol)       | 1163 | <b>3.2</b>  | <b>6.2</b>  | <b>22.5</b> | <b>11.9</b> | <b>37.0</b> | <b>34.0</b> | <b>56.7</b> | <b>68.5</b> | <b>51.7</b> | <b>45.0</b> | <b>75.5</b> | <b>42.3</b> | <b>23.1</b> | <b>14.8</b> | <b>34.1</b> | <b>59.4</b> | <b>57.5</b> | <b>35.1</b> | <b>27.1</b> |
| <i>p</i> -Anisaldehyde            | 1210 | t           | t           | t           | t           | t           | t           | t           | t           | t           | t           | t           | t           | t           | t           | t           | t           | t           | t           | t           |
| <i>cis</i> -Anethole              | 1220 | t           | t           | t           | t           | t           | t           | t           | t           | t           | t           | t           | t           | t           | t           | t           | t           | t           | t           | t           |
| <i>trans</i> -Anethole            | 1254 | <b>55.3</b> | <b>50.1</b> | <b>48.5</b> | <b>56.3</b> | <b>25.2</b> | <b>32.0</b> | <b>8.9</b>  | <b>8.9</b>  | <b>26.2</b> | <b>19.2</b> | <b>1.0</b>  | <b>22.4</b> | <b>38.4</b> | <b>43.5</b> | <b>29.2</b> | <b>13.0</b> | <b>14.8</b> | <b>40.1</b> | <b>37.0</b> |
| Palmitic acid (Hexadecanoic acid) | 1908 | t           | t           | t           | t           | t           | t           | t           | t           | t           | t           |             |             |             |             |             |             |             |             |             |
| <b>% Identification</b>           |      | 99.9        | 99.9        | 99.8        | 99.9        | 99.9        | 99.9        | 99.9        | 99.8        | 99.9        | 99.9        | 99.9        | 99.9        | 99.9        | 99.9        | 99.9        | 99.9        | 99.9        | 99.9        | 99.9        |
| <b>Grouped components</b>         |      |             |             |             |             |             |             |             |             |             |             |             |             |             |             |             |             |             |             |             |
| Monoterpene hydrocarbons          |      | 7.5         | 8.3         | 6.6         | 7.9         | 6.4         | 9.1         | 7.0         | 3.5         | 4.1         | 7.9         | 6.7         | 6.2         | 13.2        | 9.9         | 9.4         | 9.3         | 6.9         | 9.6         | 6.9         |
| Oxygen-containing monoterpenes    |      | 33.9        | 35.3        | 22.2        | 23.8        | 31.3        | 24.8        | 27.3        | 18.9        | 17.9        | 27.8        | 16.7        | 29.0        | 25.2        | 31.7        | 27.2        | 18.2        | 20.7        | 15.1        | 28.9        |
| Phenylpropanoids                  |      | 58.5        | 56.3        | 71.0        | 68.2        | 62.2        | 66.0        | 65.6        | 77.4        | 77.9        | 64.2        | 76.5        | 64.7        | 61.5        | 58.3        | 63.3        | 72.4        | 72.3        | 75.2        | 64.1        |
| Others                            |      | t           | t           | t           | t           | t           | t           | t           | t           | t           | t           |             |             |             |             |             |             |             |             |             |

RI: In-lab calculated retention index relative to C<sub>9</sub>–C<sub>20</sub> *n*-alkanes on the DB-1 column. t: traces (t < 0.05%). Bold: dominant compounds relevant for each cluster.
